# Supplementary material
Source: publisher site journal article supplement (http://compcytogen.pensoft.net/article/11395/download/suppl/36/)

**Fig. S2.** Total chromosome area for Cerrado angiosperms. \* Some predicted 2C-values based on a model generated with known 2C and TCA

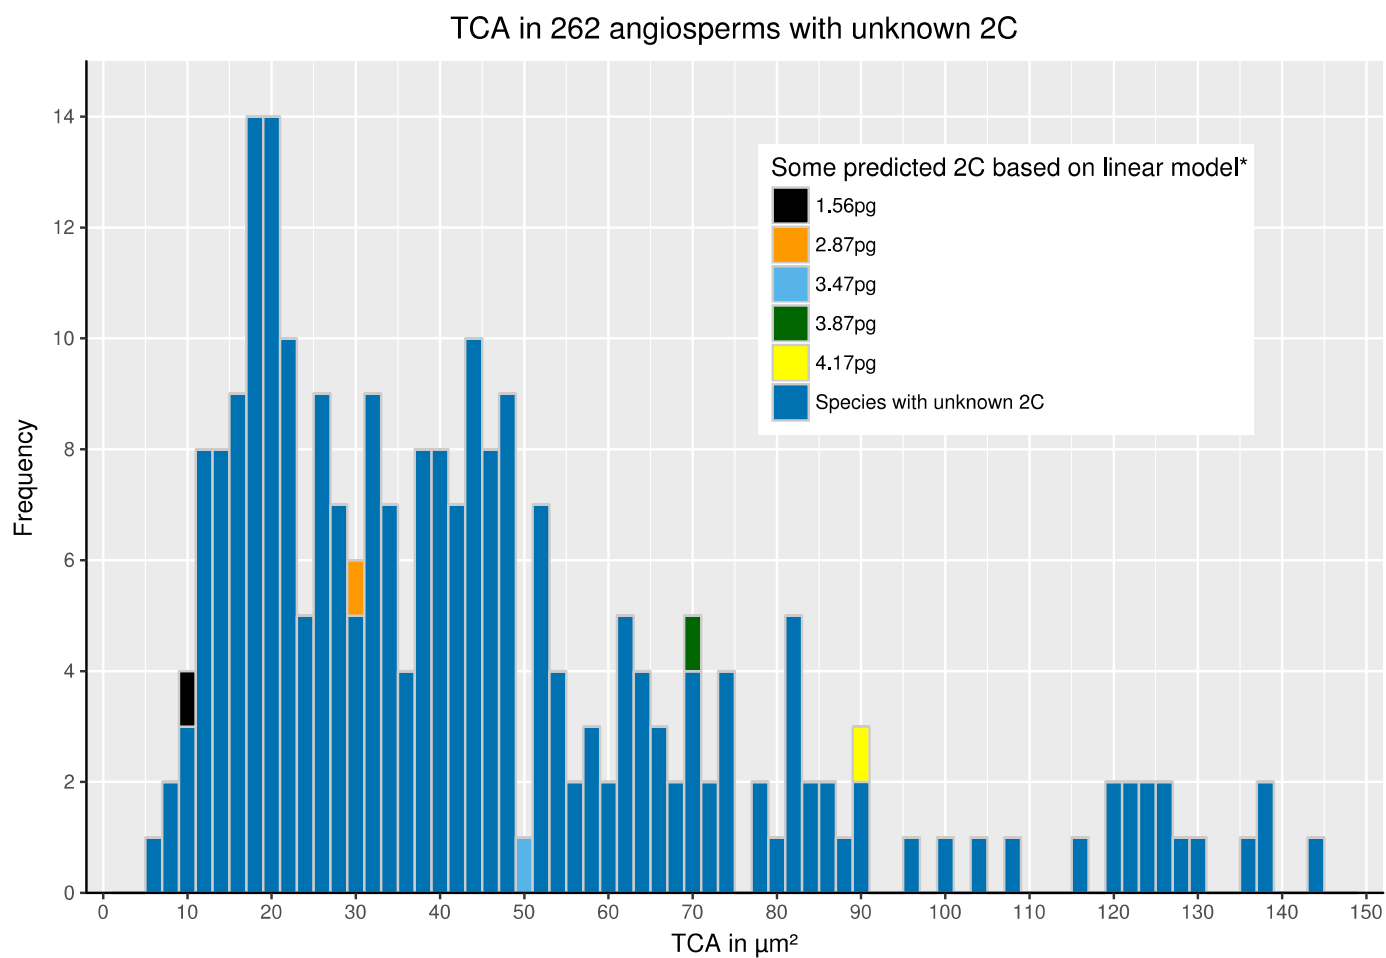

Supplement: Supplementary file
